# Supplementary material for: Total knee replacement in patients with osteoarthritis and concomitant inveterate patellar dislocation
Source: PubMed Central journal article supplement — Arthroplast Today. 2018 May 28;5(1):68–72. doi: 10.1016/j.artd.2018.04.003 (PMC6470316; doi:10.1016/j.artd.2018.04.003), 2018-05-28
Supplement: mmc1.pdf [file mmc1.pdf]

# INDIVIDUAL CONFLICT OF INTEREST STATEMENT

## *American Association of Hip and Knee Surgeons*

(Adopted from the American Academy of Orthopaedic Surgeons disclosure statement)

The following form **must be filled out completely and submitted by each author (example, 6 authors, 6 forms).**  
**All items require a response. If there is no relevant disclosure for a given item, enter "None."**

---

### Manuscript Title

1. Royalties from a company or supplier (The following conflicts were disclosed) NO
2. Speakers bureau/paid presentations for a company or supplier (The following conflicts were disclosed) NO
- 3A. Paid employee for a company or supplier (The following conflicts were disclosed) NO
- 3B. Paid consultant for a company or supplier (The following conflicts were disclosed) YES, STRYKER-SMITH&NEPHEW
- 3C. Unpaid consultants for a company or supplier (The following conflicts were disclosed) NO
4. Stock or stock options in a company or supplier (The following conflicts were disclosed) NO
5. Research support from a company or supplier as a Principal Investigator (The following conflicts were disclosed) NO
6. Other financial or material support from a company or supplier (The following conflicts were disclosed) NO
7. Royalties, financial or material support from publishers (The following conflicts were disclosed) NO
8. Medical/Orthopaedic publications editorial/governing board (The following conflicts were disclosed) YES, CHILEAN JOURNAL OF ORTHOPAEDICS, CHIEF EDITOR
9. Board member/committee appointments for a society (The following conflicts were disclosed) PRESIDENT SLARD, BOARD DIRECTORS AND EXECUTIVE COMMITTEE ISAKOS

**Each author must sign AND print or type his/her name, date and submit a separate form**

In addition, one BLINDED Conflict of Interest form (no author names used) should be submitted per manuscript with all author disclosures.

DAVID FIGUEROA MD

NOVEMBER 14<sup>TH</sup>, 2017

Author Name (Print or Type)

Author Signature

Date

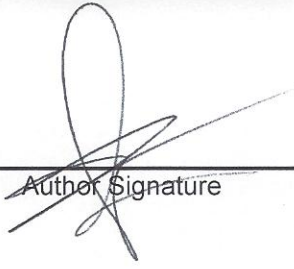A handwritten signature in black ink, consisting of several overlapping loops and a long horizontal stroke extending to the right, positioned above the 'Author Signature' label.
