# Supplementary material for: Total knee replacement in patients with osteoarthritis and concomitant inveterate patellar dislocation
Source: PubMed Central journal article supplement — Arthroplast Today. 2018 May 28;5(1):68–72. doi: 10.1016/j.artd.2018.04.003 (PMC6470316; doi:10.1016/j.artd.2018.04.003), 2018-05-28
Supplement: mmc3.pdf [file mmc3.pdf]

# INDIVIDUAL CONFLICT OF INTEREST STATEMENT

## *American Association of Hip and Knee Surgeons*

(Adopted from the American Academy of Orthopaedic Surgeons disclosure statement)

The following form **must be filled out completely and submitted by each author (example, 6 authors, 6 forms).**  
**All items require a response. If there is no relevant disclosure for a given item, enter "None."**

Clinical and Functional Outcomes in Primary Total Knee Arthroplasty A South American Perspective

### Manuscript Title

1. Royalties from a company or supplier (The following conflicts were disclosed)  
No
2. Speakers bureau/paid presentations for a company or supplier (The following conflicts were disclosed)  
No
- 3A. Paid employee for a company or supplier (The following conflicts were disclosed)  
No
- 3B. Paid consultant for a company or supplier (The following conflicts were disclosed)  
No
- 3C. Unpaid consultants for a company or supplier (The following conflicts were disclosed)  
No
4. Stock or stock options in a company or supplier (The following conflicts were disclosed)  
No
5. Research support from a company or supplier as a Principal Investigator (The following conflicts were disclosed)  
No
6. Other financial or material support from a company or supplier (The following conflicts were disclosed)  
No
7. Royalties, financial or material support from publishers (The following conflicts were disclosed)  
No
8. Medical/Orthopaedic publications editorial/governing board (The following conflicts were disclosed)  
No
9. Board member/committee appointments for a society (The following conflicts were disclosed)  
No

**Each author must sign AND print or type his/her name, date and submit a separate form**

In addition, one BLINDED Conflict of Interest form (no author names used) should be submitted per manuscript with all author disclosures.

FRANCISCO FIGUEROA  
Author Name (Print or Type)

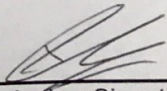  
Author Signature

DECEMBER 4<sup>TH</sup> 2017  
Date
